# Supplementary material
Source: PubMed Central journal article supplement (PMC10991470)
Supplement: 262_2021_3089_MOESM1_ESM.pdf [file 262_2021_3089_MOESM1_ESM.pdf]

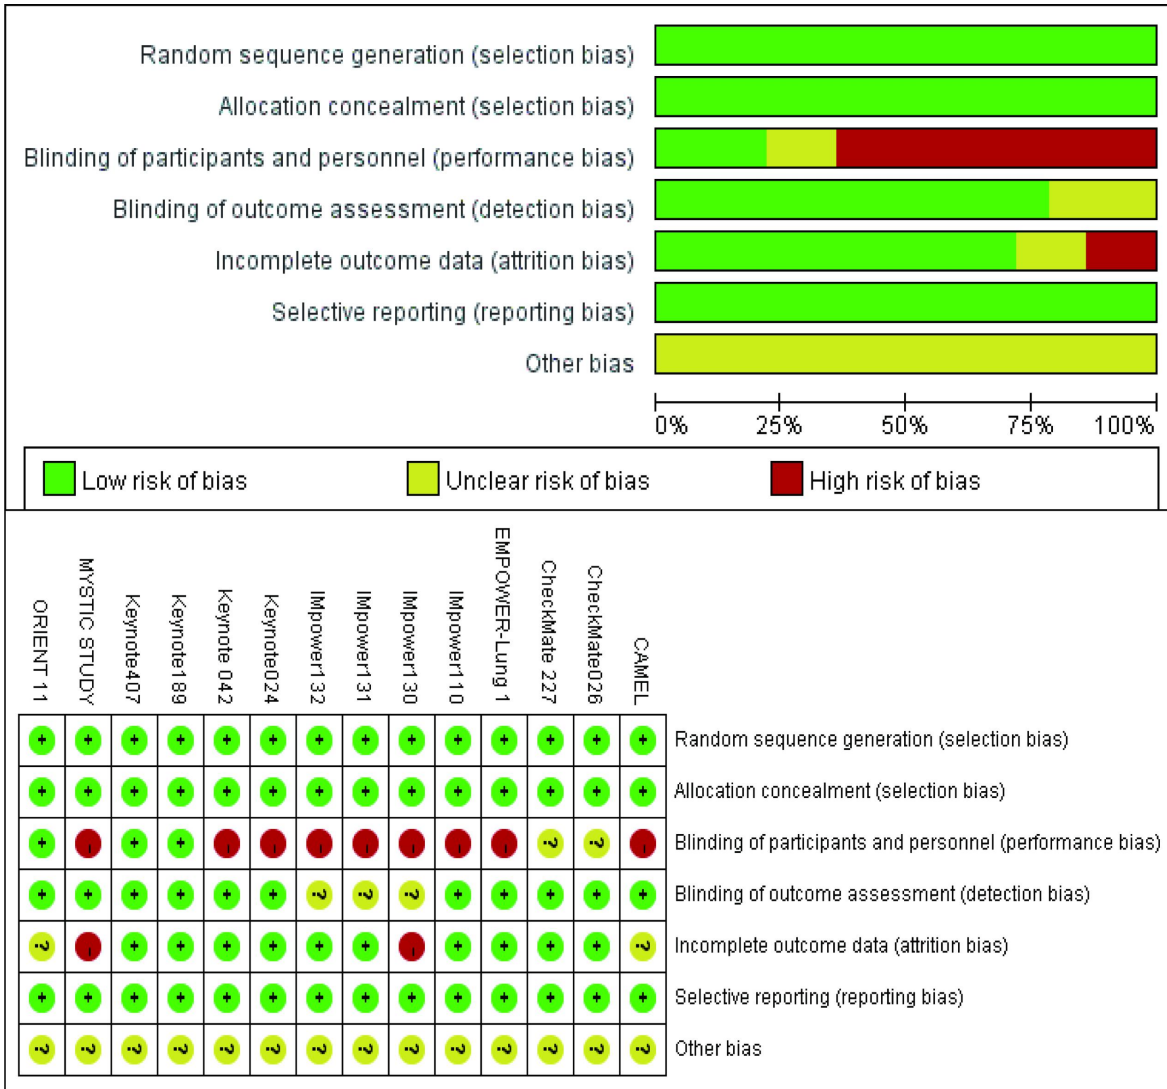

**Supplementary Fig.1** The quality of included studies with the Cochrane Collaboration tool.

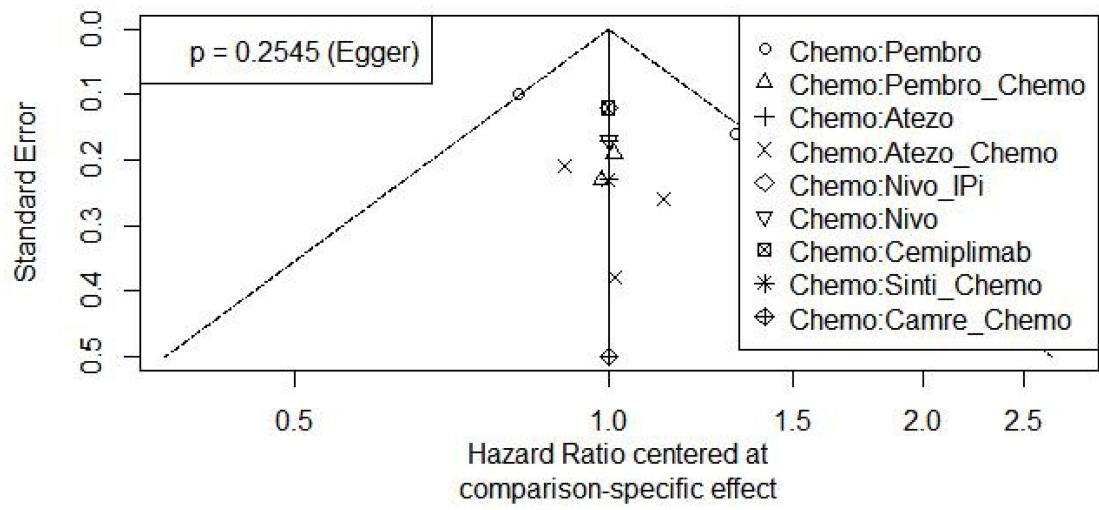

**Supplementary Fig.2** Egger regression test with a funnel plot.



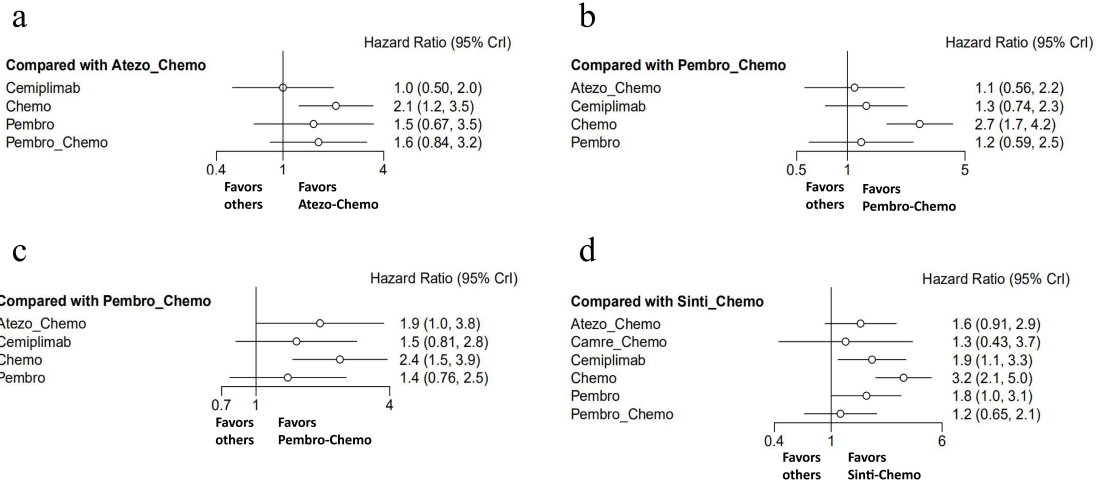

**Supplementary Fig.4** Forest plots of pairwise comparisons for subgroup: (A) Overall survival of squamous NSCLC; (B) Progression free survival of squamous NSCLC; (C) Overall survival of nonsquamous NSCLC; (D) Progression free survival of nonsquamous NSCLC.

**Supplementary Table 1** Baseline Characteristics of Trials Included in the Network Meta-analysis

| Baseline Characteristics of Trials Included in the Network Meta-analysis |                         |                               |                               |                                  |                                 |                         |                         |
|--------------------------------------------------------------------------|-------------------------|-------------------------------|-------------------------------|----------------------------------|---------------------------------|-------------------------|-------------------------|
| Characteristics                                                          | keynote024<br>n=154/151 | keynote042<br>n=637/637       | keynote407<br>n=278/281       | keynote189<br>n=410/206          | IMpower110<br>n=277/277         | IMpower130<br>n=451/228 | IMpower131<br>n=343/340 |
|                                                                          | Pembro<br>/ Chemo       | Pembro<br>/ Chemo             | Pembro-Chemo<br>/ Chemo       | Pembro-Chemo<br>/ Chemo          | Atezo<br>/ Chemo                | Atezo-Chemo<br>/ Chemo  | Atezo-Chemo<br>/ Chemo  |
| <b>PDL1 expression level (%)</b>                                         |                         |                               |                               |                                  |                                 |                         |                         |
| <1%                                                                      | 0% / 0%                 | 0% / 0%                       | 34% / 35%                     | 31% / 31%                        | 0% / 0%                         | 52% / 53%               | 46% / 50%               |
| 1-49%                                                                    | 0% / 0%                 | 53% / 53%                     | 37% / 37%                     | 31% / 28%                        | 61% / 65%                       | 28% / 29%               | 40% / 37%               |
| ≥50%                                                                     | 100% / 100%             | 47% / 47%                     | 26% / 26%                     | 32% / 34%                        | 39% / 35%                       | 20% / 18%               | 14% / 13%               |
| <b>Gender (%)</b>                                                        |                         |                               |                               |                                  |                                 |                         |                         |
| Male                                                                     | 60% / 63%               | 71% / 71%                     | 79% / 84%                     | 62% / 53%                        | 71% / 70%                       | 59% / 59%               | 82% / 82%               |
| Female                                                                   | 40% / 37%               | 29% / 29%                     | 21% / 16%                     | 38% / 47%                        | 29% / 30%                       | 41% / 41%               | 18% / 18%               |
| <b>Age</b>                                                               |                         |                               |                               |                                  |                                 |                         |                         |
| Median (years)                                                           | 64.5 / 66               | 63 / 64                       | 65 / 65                       | 65 / 64                          | 64 / 65                         | 64 / 65                 | 65 / 65                 |
| <65 yr (%)                                                               | NR                      | 56% / 55%                     | 46% / 45%                     | 48% / 56%                        | NR                              | 50% / 50%               | 50% / 46%               |
| <b>Smoking status (%)</b>                                                |                         |                               |                               |                                  |                                 |                         |                         |
| Current or former                                                        | 97% / 87%               | 78% / 78%                     | 92% / 93%                     | 88% / 88%                        | 87% / 87%                       | 89% / 93%               | 91% / 93%               |
| Never                                                                    | 3% / 13%                | 22% / 22%                     | 8% / 7%                       | 12% / 12%                        | 13% / 13%                       | 11% / 7%                | 9% / 7%                 |
| <b>ECOG performance-status score (%)</b>                                 |                         |                               |                               |                                  |                                 |                         |                         |
| 0                                                                        | 35% / 35%               | 31% / 30%                     | 26% / 32%                     | 45% / 39%                        | 35% / 37%                       | 42% / 40%               | 34% / 32%               |
| ≥1                                                                       | 65% / 65%               | 69% / 70%                     | 74% / 68%                     | 55% / 61%                        | 65% / 63%                       | 58% / 60%               | 66% / 68%               |
| <b>Region of enrollment (%)</b>                                          |                         |                               |                               |                                  |                                 |                         |                         |
| East Asia                                                                | 14% / 13%               | 29% / 29%                     | 19% / 19%                     | 1% / 3%                          | 16% / 11%                       | 3% / 1%                 | 12% / 11%               |
| Non-East Asia                                                            | 86% / 87%               | 71% / 71%                     | 81% / 81%                     | 99% / 97%                        | 84% / 89%                       | 97% / 99%               | 88% / 89%               |
| <b>Brain metastases</b>                                                  |                         |                               |                               |                                  |                                 |                         |                         |
|                                                                          | 18% / 10%               | 5% / 5%                       | 7% / 9%                       | 18% / 17%                        | NR                              | NR                      | NR                      |
| Baseline Characteristics of Trials Included in the Network Meta-analysis |                         |                               |                               |                                  |                                 |                         |                         |
| Characteristics                                                          | IMpower132<br>n=292/286 | CheckMate<br>227<br>n=583/583 | CheckMate<br>026<br>n=271/270 | MYSTIC<br>STUDY<br>n=372/374/372 | EMPOWER-<br>Lung01<br>n=283/280 | ORIENT 11<br>n=266/131  | CAMEL<br>n=205/207      |
|                                                                          | Atezo-Chemo<br>/ Chemo  | Nivo-Ipi<br>/ Chemo           | Nivo<br>/ Chemo               | Durva-Treme/<br>Durva / Chemo    | Cemiplimab<br>/ Chemo           | Sinti-Chemo<br>/ Chemo  | Camre-Chemo<br>/ Chemo  |
| <b>PDL1 expression level (%)</b>                                         |                         |                               |                               |                                  |                                 |                         |                         |
| <1%                                                                      | 50% / 45%               | 32% / 32%                     | 0% / 0%                       | 20%/25%/22%                      | 0% / 0%                         | 32% / 34%               | 24% / 33%               |
| 1-49%                                                                    | 36% / 43%               | 33% / 35%                     | 68% / 53%                     | 51%/43%/49%                      | 0% / 0%                         | 28% / 20%               | 53% / 47%               |
| ≥50%                                                                     | 14% / 12%               | 35% / 43%                     | 32% / 47%                     | 29%/32%/29%                      | 100% / 100%                     | 40% / 46%               | 15% / 10%               |
| <b>Gender (%)</b>                                                        |                         |                               |                               |                                  |                                 |                         |                         |
| Male                                                                     | 66% / 67%               | 67% / 66%                     | 68% / 56%                     | 72%/68%/67%                      | 88% / 83%                       | 77% / 76%               | 71% / 72%               |
| Female                                                                   | 34% / 33%               | 33% / 34%                     | 32% / 45%                     | 28%/32%/33%                      | 12% / 17%                       | 23% / 24%               | 29% / 28%               |
| <b>Age</b>                                                               |                         |                               |                               |                                  |                                 |                         |                         |
| Median (years)                                                           | 64 / 63                 | 64 / 64                       | 63 / 65                       | 66 / 65 / 64                     | 63 / 64                         | 61 / 61                 | 59 / 61                 |
| <65 yr (%)                                                               | 52% / 59%               | 53% / 52%                     | NR                            | NR                               | 55% / 52%                       | NR                      | 78% / 74%               |
| <b>Smoking status (%)</b>                                                |                         |                               |                               |                                  |                                 |                         |                         |
| Current or former                                                        | 87% / 89%               | 85% / 86%                     | 89% / 89%                     | 85%/85%/86%                      | 100% / 100%                     | 64% / 66%               | 62% / 63%               |
| Never                                                                    | 13% / 11%               | 14% / 13%                     | 11% / 11%                     | 15%/15%/14%                      | 0% / 0%                         | 36% / 34%               | 38% / 37%               |

**ECOG performance-status score (%)**

|    |           |           |           |             |           |           |           |
|----|-----------|-----------|-----------|-------------|-----------|-----------|-----------|
| 0  | 43% / 40% | 35% / 33% | 31% / 34% | 42%/37%/43% | 27% / 27% | 29% / 26% | 23% / 17% |
| ≥1 | 57% / 60% | 65% / 67% | 69% / 66% | 58%/63%/57% | 73% / 73% | 71% / 74% | 77% / 83% |

**Region of enrollment (%)**

|               |           |    |    |             |           |             |             |
|---------------|-----------|----|----|-------------|-----------|-------------|-------------|
| East Asia     | 24% / 23% | NR | NR | 32%/33%/32% | 11% / 10% | 100% / 100% | 100% / 100% |
| Non-East Asia | 76% / 77% | NR | NR | 68%/67%/68% | 89% / 90% | 0% / 0%     | 0% / 0%     |

**Brain metastases**

|    |    |           |    |           |           |         |
|----|----|-----------|----|-----------|-----------|---------|
| NR | NR | 12% / 13% | NR | 12% / 12% | 14% / 17% | 5% / 2% |
|----|----|-----------|----|-----------|-----------|---------|

---

Abbreviations: Pembro, Pembrolizumab; Chemo, Chemotherapy; Pembro-Chemo, Pembrolizumab plus Chemotherapy; Atezo, Atezolizumab; Atezo-Chemo, Atezolizumab plus Chemotherapy; Nivo-Ipi, Ipilimumab and Nivolumab; Nivo, Nivolumab; Durva-Treme, Durvalumab plus Tremelimumab; Durva, Durvalumab; Sinti-Chemo, Sintilimab plus Chemotherapy; Camre-Chemo, Camrelizumab plus Chemotherapy; NR, not reported.
